# Supplementary material for: Constraining uncertainties in particle wall-deposition correctionduring SOA formation in chamber experiments
Source: Copernicus journal article supplement (doi:10.5194/acp-2016-820), 2016-09-19
Supplement: Supplementary file 1 [file acp-2016-820-supplement.pdf]

1 **Supplementary Information:**

2 **Constraining uncertainties in particle wall-deposition correction during SOA**  
3 **formation in chamber experiments**

4

5 T. Nah,<sup>1</sup> R. C. McVay,<sup>2</sup> J.R. Pierce,<sup>3</sup> J. H. Seinfeld<sup>2,4</sup> and N. L. Ng<sup>1,5\*</sup>

6

7 <sup>1</sup>*School of Chemical and Biomolecular Engineering, Georgia Institute of Technology, Atlanta, GA, USA*

8 <sup>2</sup>*Division of Chemistry and Chemical Engineering, California Institute of Technology, Pasadena, CA, USA*

9 <sup>3</sup>*Department of Atmospheric Science, Colorado State University, Fort Collins, CO, USA*

10 <sup>4</sup>*Division of Engineering and Applied Science, California Institute of Technology, Pasadena, CA, USA*

11 <sup>5</sup>*School of Earth and Atmospheric Sciences, Georgia Institute of Technology, Atlanta, GA, USA*

12

13 \* To whom correspondence should be addressed: [ng@chbe.gatech.edu](mailto:ng@chbe.gatech.edu)

14

15

16

17

18

19

20

21

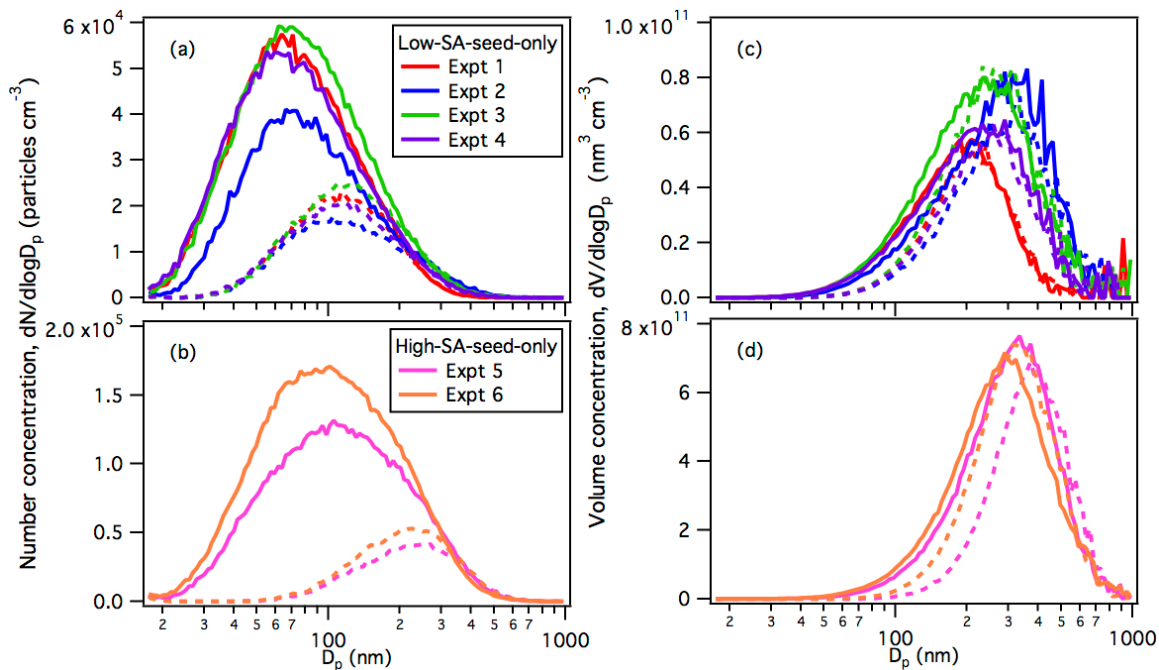

22

23 **Figure S1:** Initial (solid lines) and final (420 min later, dashed lines) number and volume  
 24 size distributions during the low-SA-seed-only (panels (a) and (c)) and high-SA-seed-only  
 25 (panels (b) and (d)) experiments. Refer to Table 1 for information on the AS solution(s)  
 26 used to generate the seed aerosol and the initial seed aerosol surface area concentrations in  
 27 these experiments.

28

29

30

31

32

33

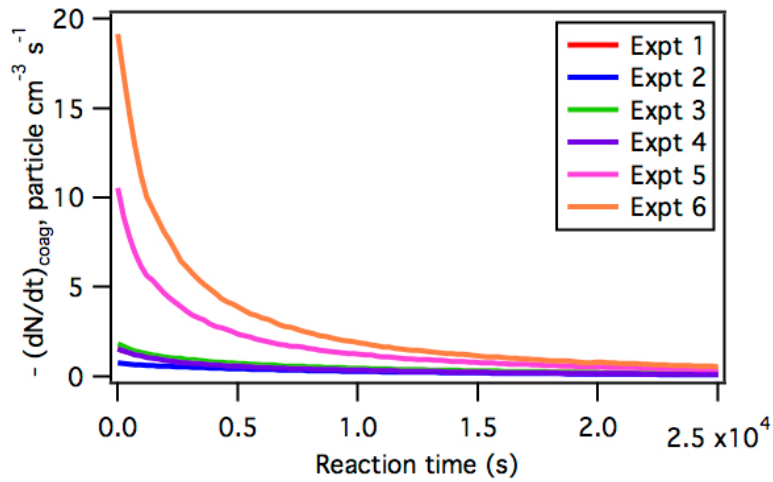

34

35 **Figure S2:** Change in total particle number concentration due to coagulation alone as a  
 36 function of reaction time for the seed-only experiments. These results are obtained from  
 37 the aerosol-dynamics model using the raw time-dependent number distribution data  
 38 measured by the SMPS during seed-only experiments and coagulation coefficients  
 39 calculated from Table 13.1 in Seinfeld and Pandis (2016).

40

41

42

43

44

45

46

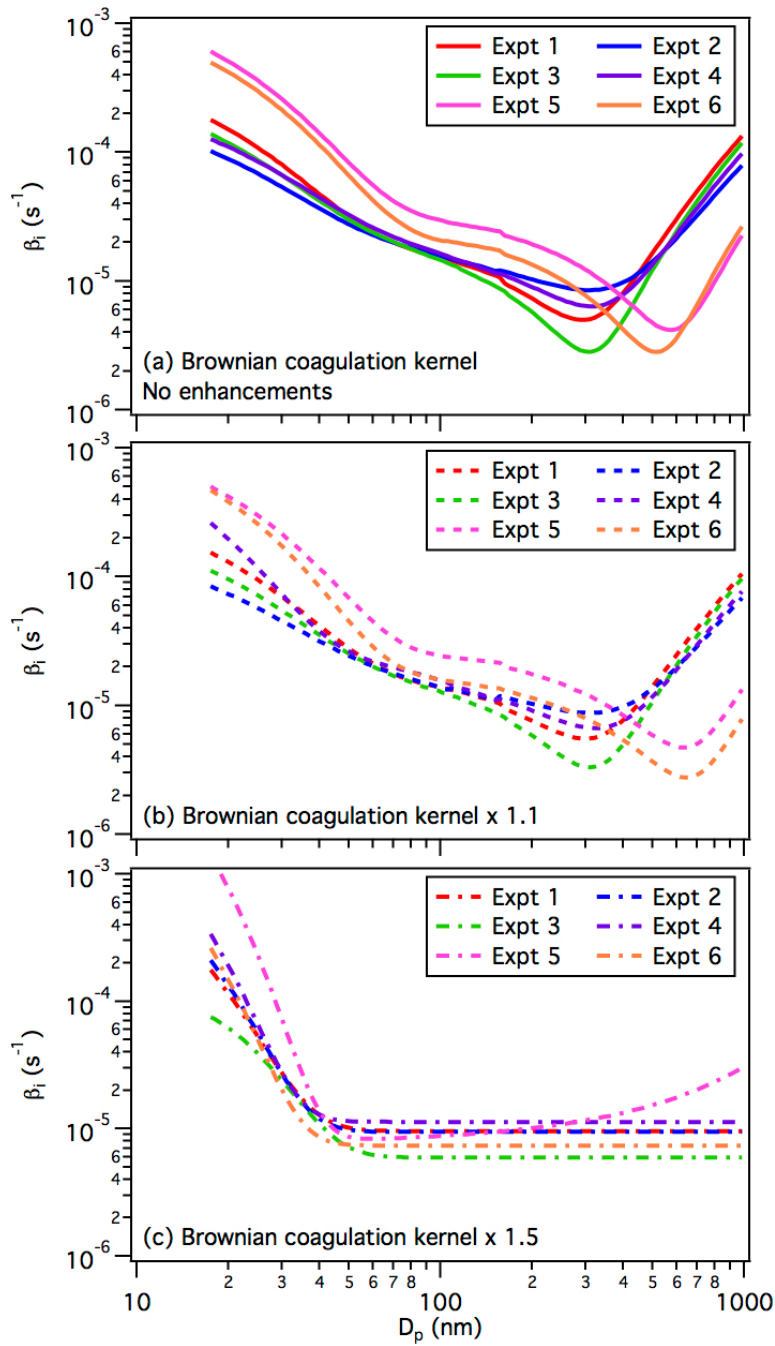

47

48 **Figure S3:** Coagulation-corrected particle wall-deposition coefficients ( $\beta_i$ ) for seed-only  
 49 experiments. In panel (a), the coagulation-corrected particle wall-deposition coefficients  
 50 are obtained using the Brownian coagulation kernel calculated from Table 13.1 in Seinfeld  
 51 and Pandis (2016). In panels (b) and (c), the Brownian coagulation kernel is scaled by 1.1  
 52 and 1.5 uniformly across all particle sizes, respectively.

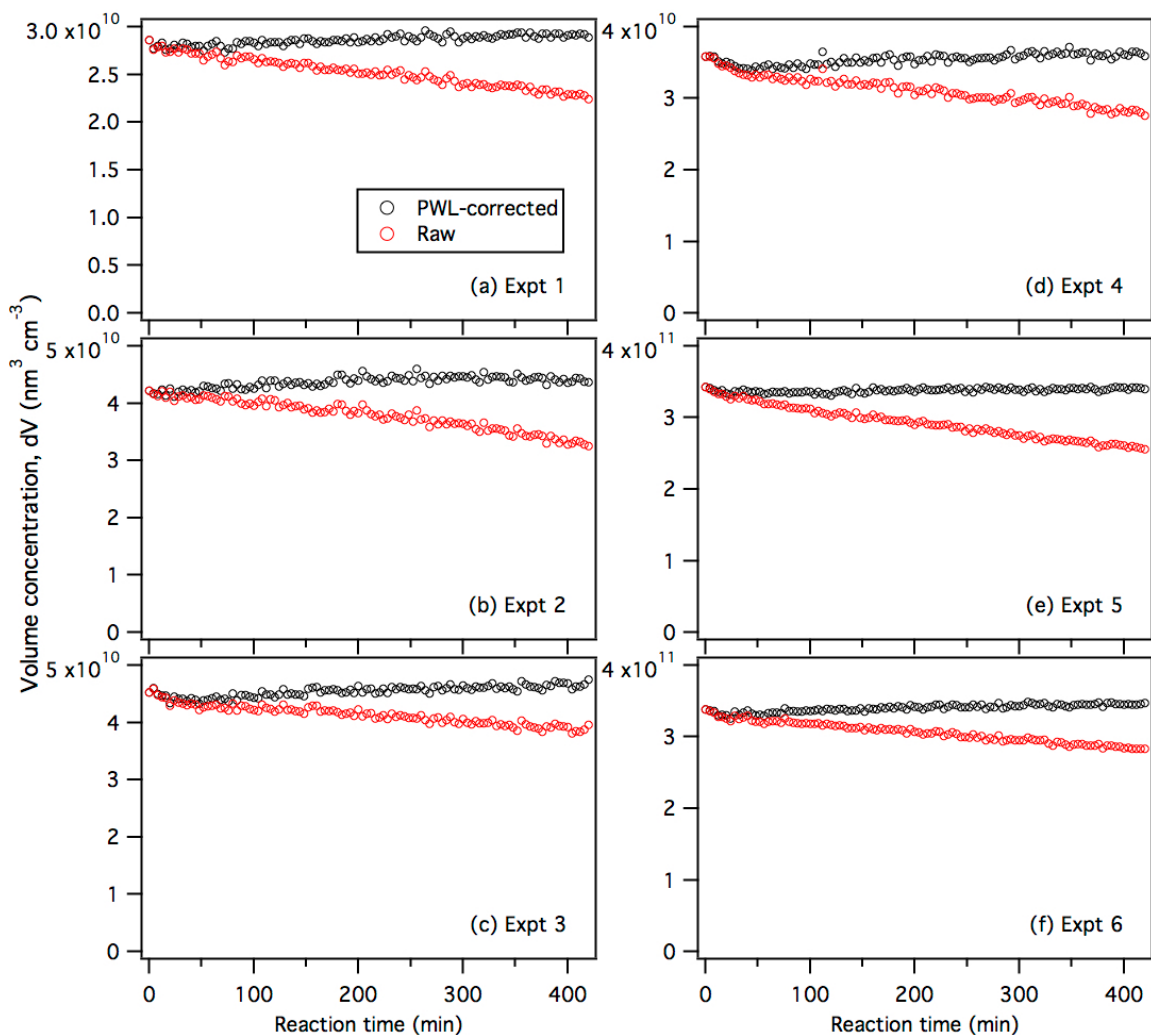

53

54 **Figure S4:** Raw (red) and particle wall-loss-corrected (black) volume concentrations as a  
 55 function of reaction time for the low-SA-seed-only and high-SA-seed-only experiments.  
 56 Coagulation-corrected size-dependent particle wall-deposition coefficients are used to  
 57 correct for particle wall-deposition in the analysis shown here. Refer to Table 1 for  
 58 information on the AS solution(s) used to generate the seed aerosol and the initial seed  
 59 aerosol surface area concentrations in these experiments.

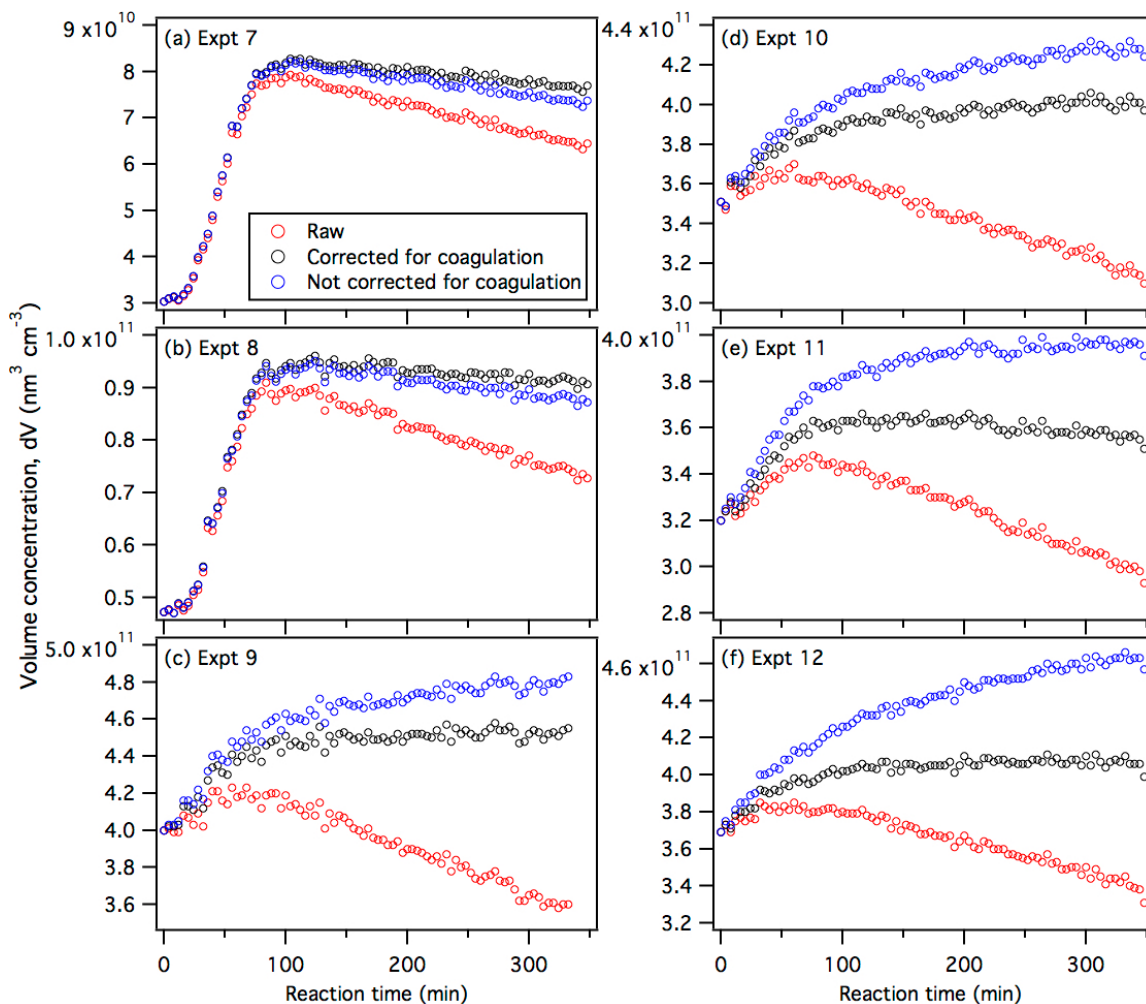

60

61 **Figure S5:** Raw (red) and particle wall-deposition-corrected volume concentrations for the  
 62  $\alpha$ -pinene ozonolysis experiments. The uncorrected (blue) and coagulation-corrected  
 63 (black) size-dependent particle wall-deposition coefficients are used to correct for particle  
 64 wall-deposition in the analyses shown here.

65

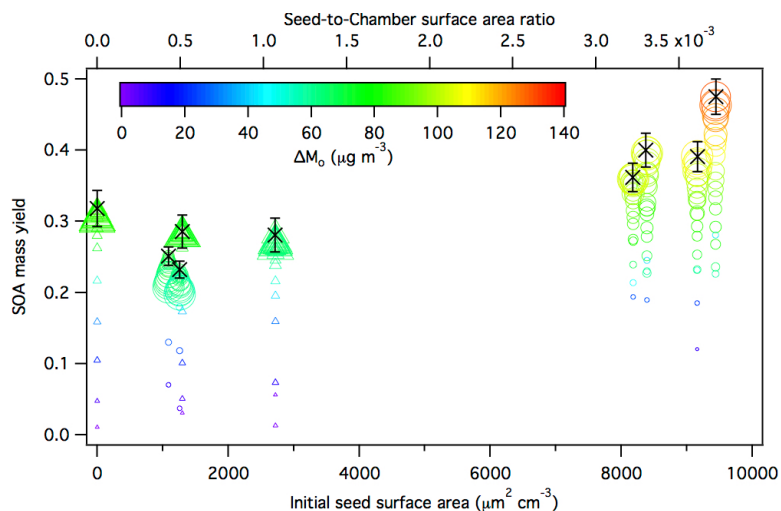

66

67 **Figure S6:** Averaged SOA mass yields over the course of an  $\alpha$ -pinene ozonolysis  
 68 experiment as a function of initial total AS seed aerosol surface area concentration. Results  
 69 from this study (15 min-averaged) are shown as circles, while results from the study by  
 70 Nah et al. (2016) (10 min-averaged) are shown as triangles. All the SOA mass yields shown  
 71 here (this study and the study by Nah et al. (2016)) are obtained using the uncorrected size-  
 72 dependent particle wall-deposition coefficients (that do not account for coagulation).  
 73 Symbol color indicates the SOA mass concentration and symbol size indicates the time  
 74 after  $O_3$  is injected into the chamber. The  $\times$  symbols are the SOA mass yields at peak SOA  
 75 growth obtained from the experimental data. The y-axis error bars represent the uncertainty  
 76 in the SOA mass yield at peak SOA growth, which originates from the  $\alpha$ -pinene injection  
 77 and the aerosol mass concentration at peak SOA growth (one standard deviation).

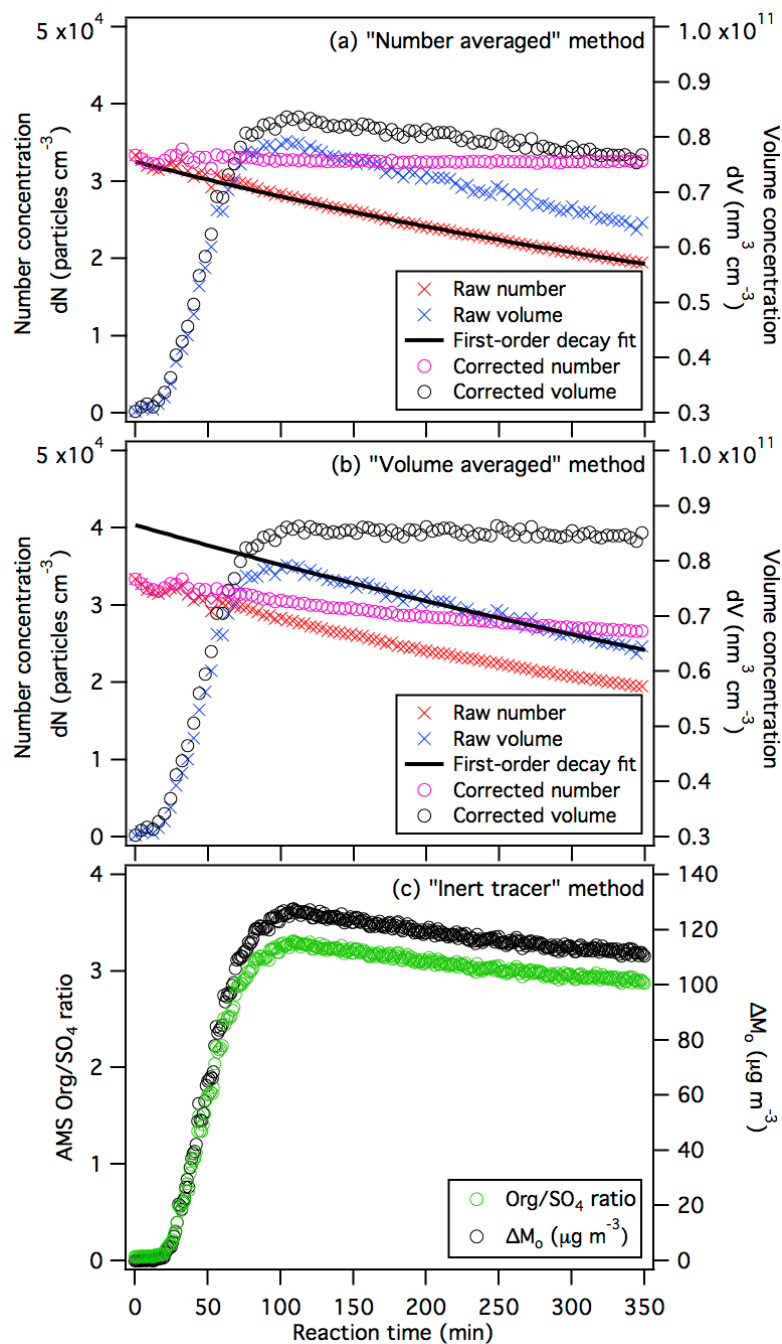

78

79 **Figure S7:** Example of particle wall-deposition rate calculation and correction (experiment  
 80 7) using the (a) "number averaged", (b) "volume averaged" and (c) "inert tracer" particle  
 81 wall-deposition correction methods. The "number averaged" and "volume averaged"  
 82 methods apply the first-order decay fits of the raw number and volume concentrations,  
 83 respectively, to the entire experiment to account for particle wall-deposition. The "inert  
 84 tracer method" uses the organic-to-sulfate (Org/ $\text{SO}_4$ ) ratio obtained from HR-ToF-AMS  
 85 measurements to determine the SOA mass concentration.

86



87 **Table S1:** Initial and particle wall-deposition-corrected final total volume concentrations  
 88 for seed only experiments<sup>a</sup>

| Expt | AS seed conditions  | Initial Seed aerosol surface area ( $\mu\text{m}^2 \text{cm}^{-3}$ ) | Initial Volume Concentration ( $\text{nm}^3 \text{cm}^{-3}$ ) | Final Volume Concentration ( $\text{nm}^3 \text{cm}^{-3}$ ) <sup>b</sup> | % Change <sup>c</sup> |
|------|---------------------|----------------------------------------------------------------------|---------------------------------------------------------------|--------------------------------------------------------------------------|-----------------------|
| 1    | 0.015 M AS          | 1090                                                                 | $2.86 \times 10^{10}$                                         | $2.89 \times 10^{10}$                                                    | 1.0                   |
| 2    | 0.05 M AS           | 1190                                                                 | $4.22 \times 10^{10}$                                         | $4.37 \times 10^{10}$                                                    | 3.6                   |
| 3    | 0.015 M & 0.05 M AS | 1470                                                                 | $4.53 \times 10^{10}$                                         | $4.75 \times 10^{10}$                                                    | 4.9                   |
| 4    | 0.015 M & 0.05 M AS | 1210                                                                 | $3.58 \times 10^{10}$                                         | $3.59 \times 10^{10}$                                                    | 0.3                   |
| 5    | 0.05 M AS           | 8000                                                                 | $3.43 \times 10^{11}$                                         | $3.4 \times 10^{11}$                                                     | -0.9                  |
| 6    | 0.015 M & 0.05 M AS | 8580                                                                 | $3.38 \times 10^{11}$                                         | $3.47 \times 10^{11}$                                                    | 2.7                   |

89 <sup>a</sup>Particle volume concentrations (dV)

90 <sup>b</sup>The data shown here correspond to those shown in Fig. S4. The data have been particle  
 91 wall-deposition-corrected using coagulation-corrected particle wall-deposition coefficients  
 92 (with no enhancement to the coagulation rates) determined using the aerosol-dynamics  
 93 model (described in section 3) and the experimental data.

94 <sup>c</sup>% Change =  $\frac{\text{(Difference between initial and particle wall-loss-corrected final number concentration)}}{\text{Initial number concentration}} \times 100\%$
